# Supplementary material
Source: MDPI journal article supplement (https://www.mdpi.com/2304-6740/11/1/24)
Supplement: s1 [file s1]

for

Vladimir Burmistrov <sup>1</sup>, Viktor Aleksandriiskii <sup>1\*</sup>, Igor Novikov <sup>1</sup>, Alena Batrakova <sup>1</sup>, Dmitry Belykh <sup>2</sup>, Olga Startseva <sup>2</sup>, Oskar.I. Koifman <sup>1</sup>

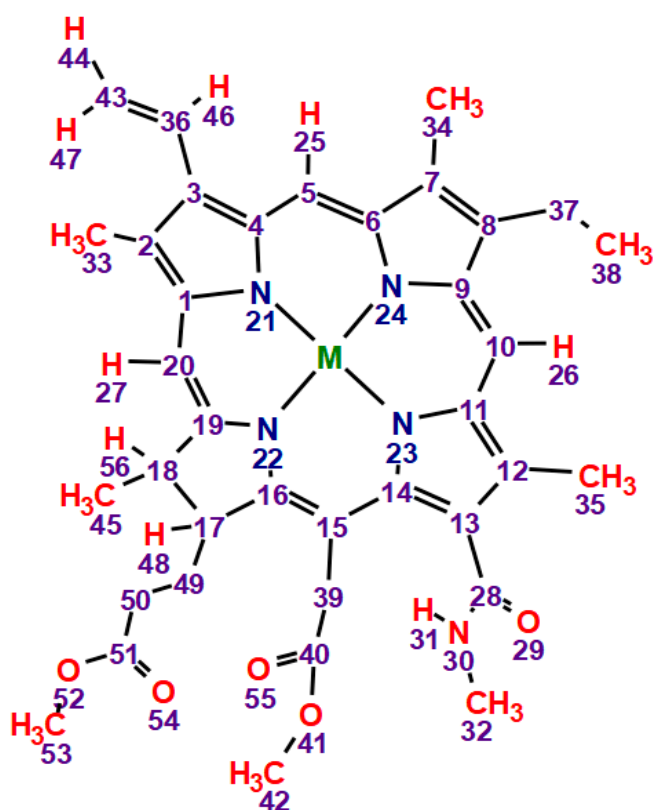

### Atom designations M-MADMECl for NMR spectra

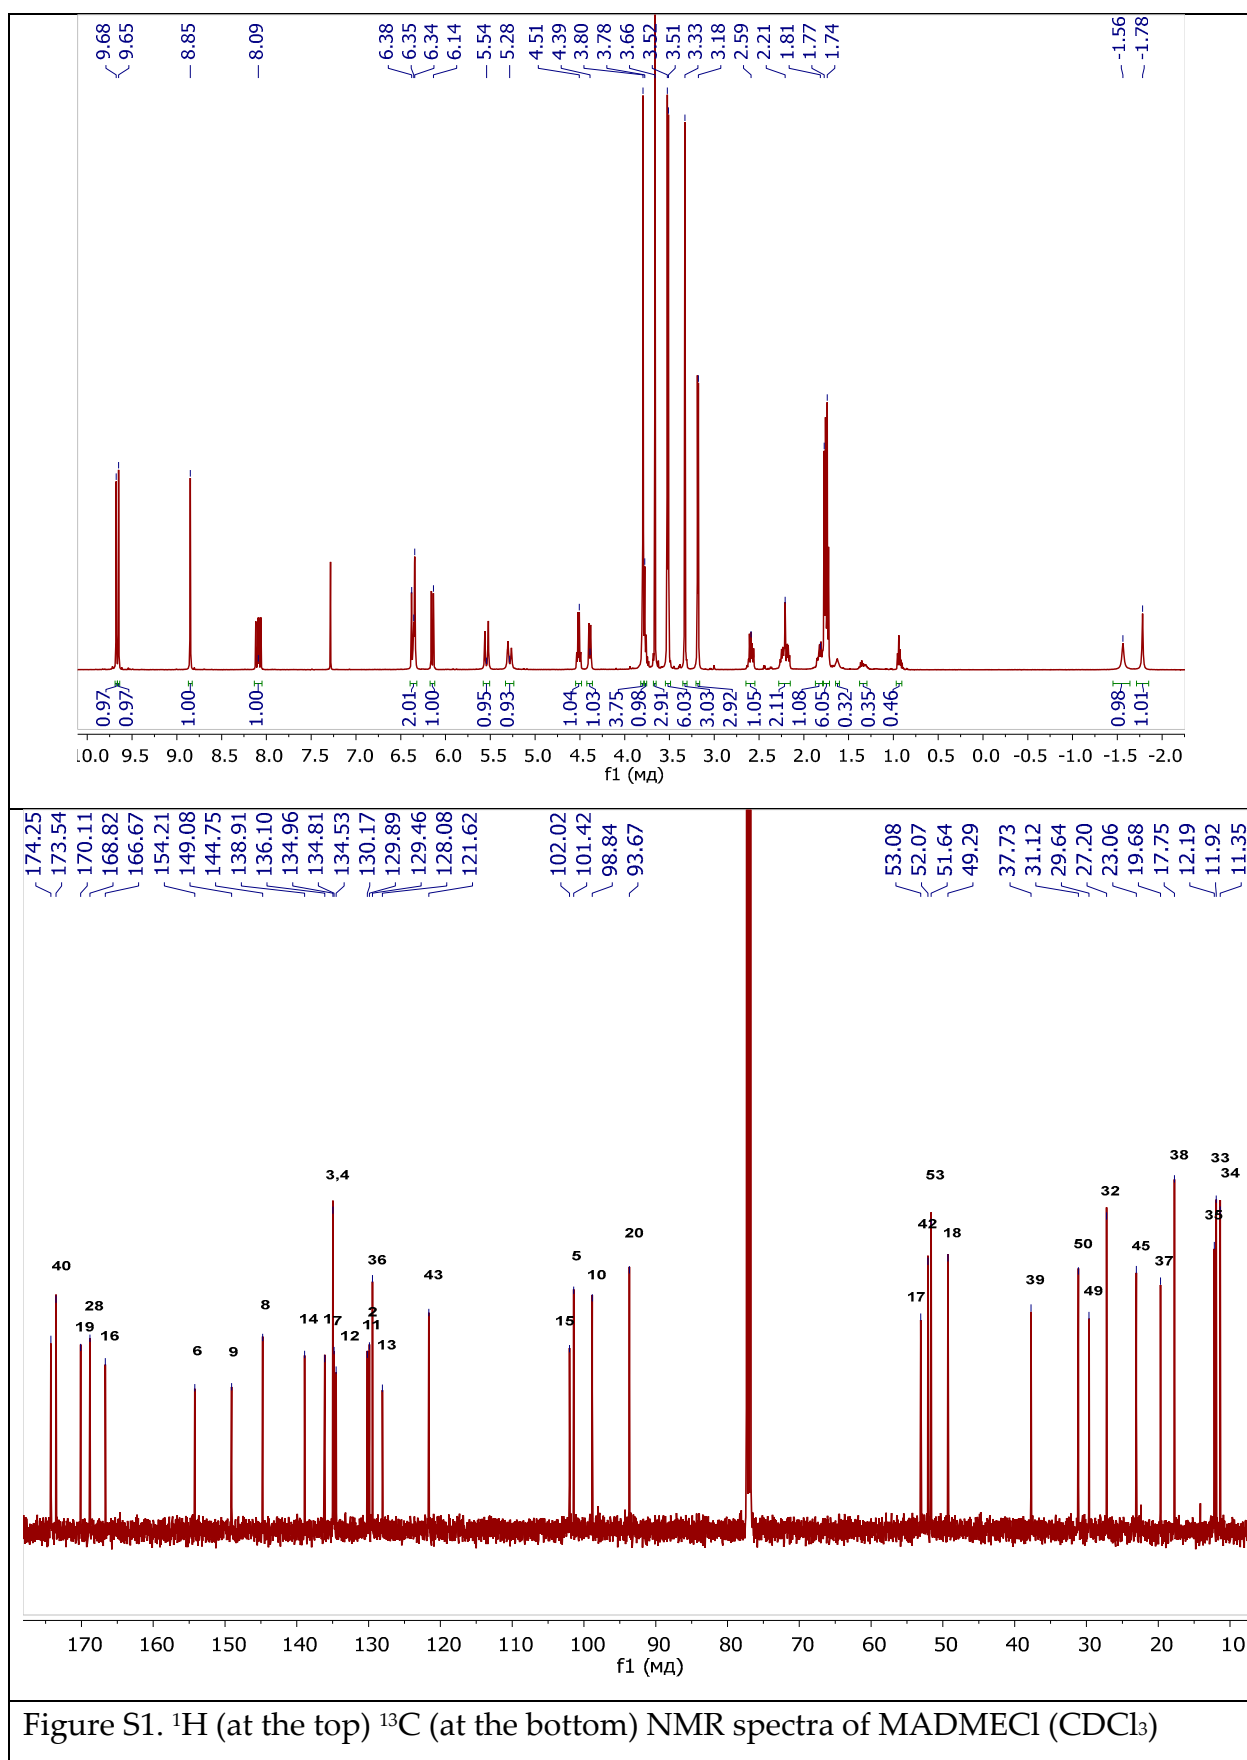

Figure S1. <sup>1</sup>H (at the top) <sup>13</sup>C (at the bottom) NMR spectra of MADMECl (CDCl<sub>3</sub>)

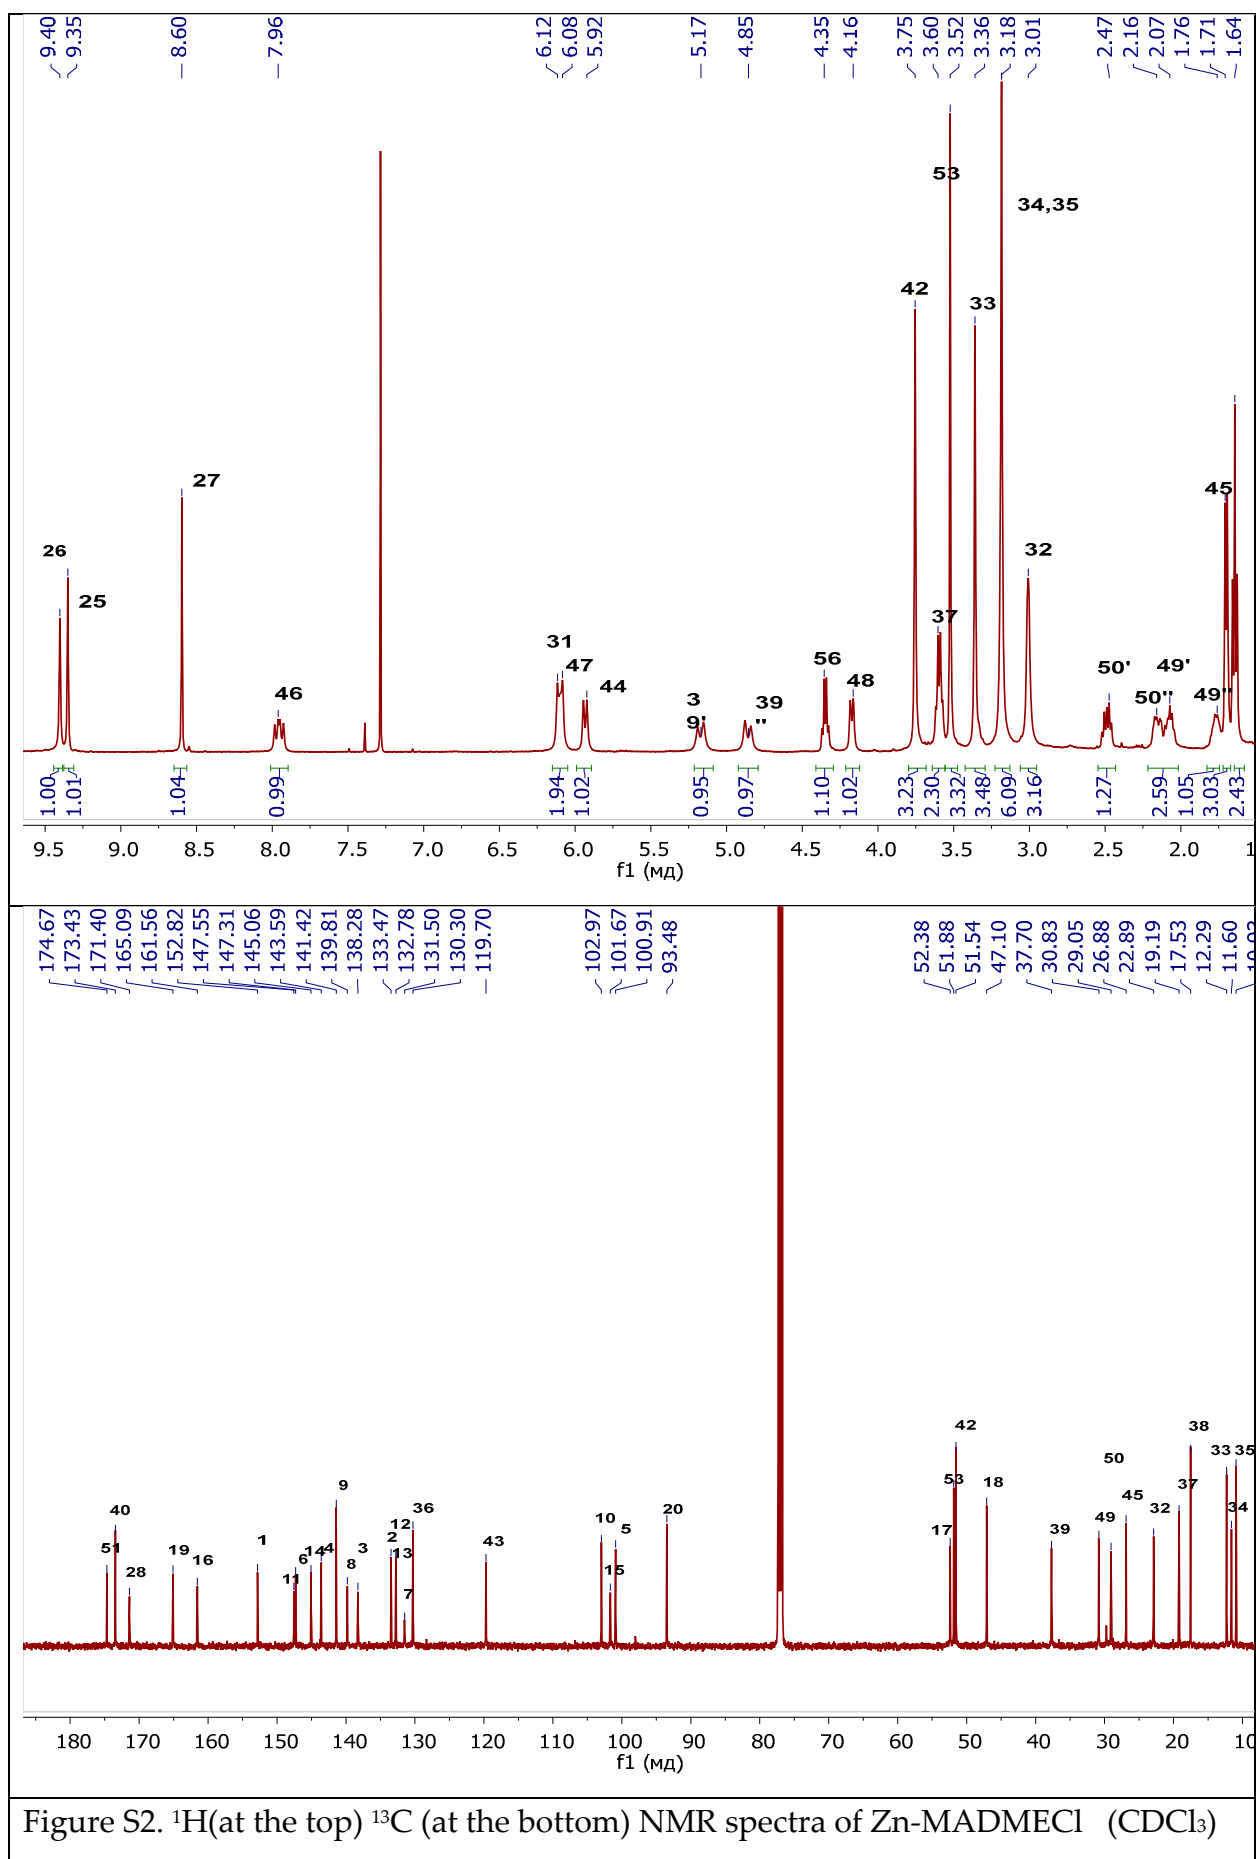

Figure S2. <sup>1</sup>H(at the top) <sup>13</sup>C (at the bottom) NMR spectra of Zn-MADMECl (CDCl<sub>3</sub>)

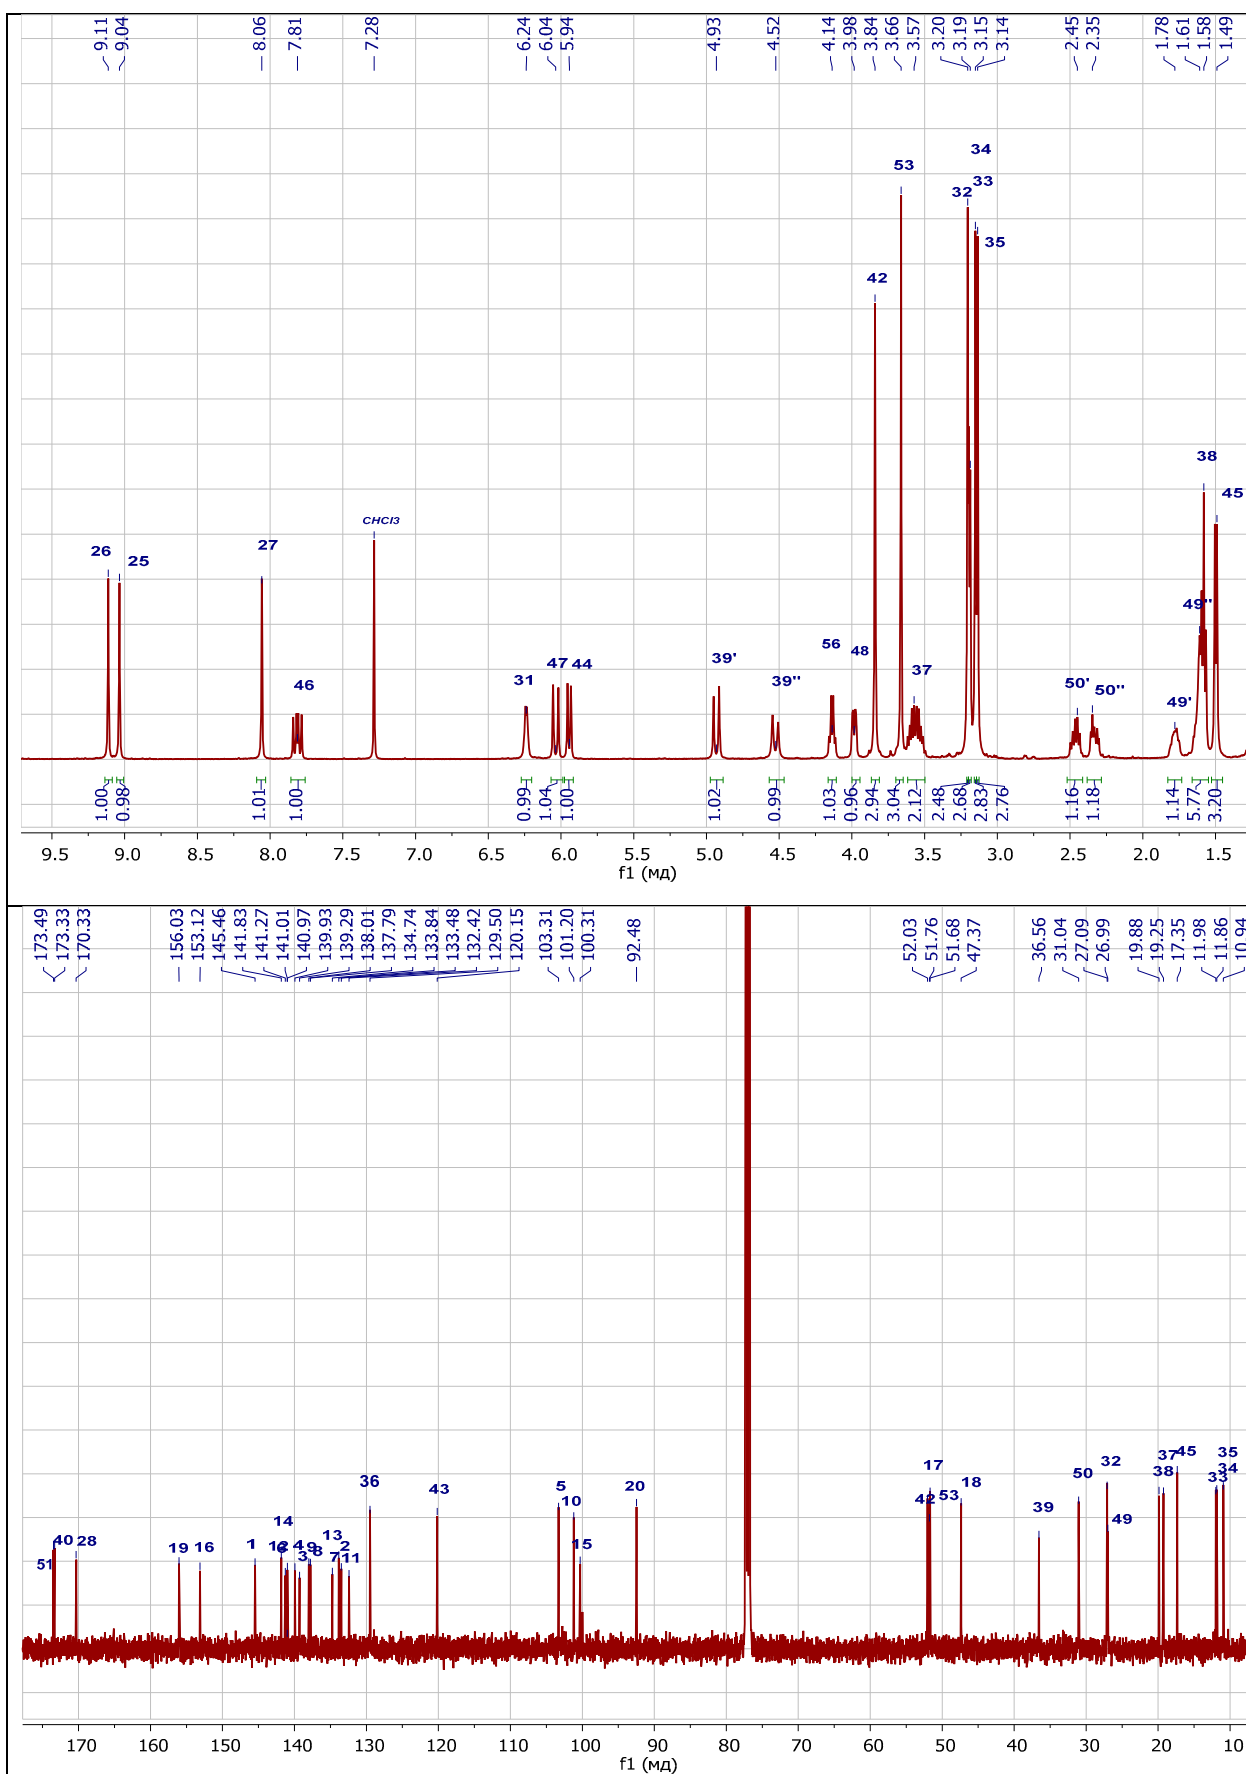

Figure S3. <sup>1</sup>H(at the top) <sup>13</sup>C (at the bottom) NMR spectra of Ni-MADMECl (CDCl<sub>3</sub>)

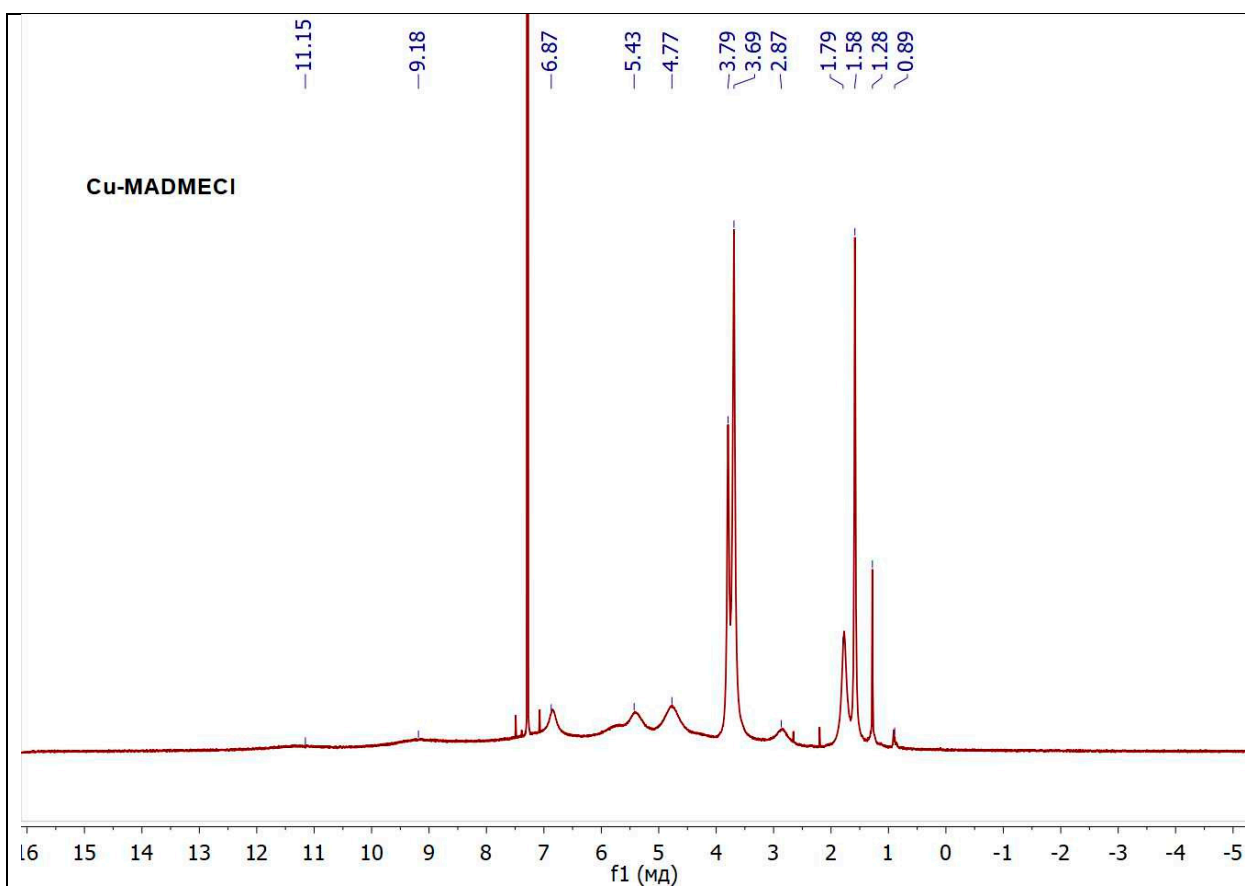

Figure S4.  $^1\text{H}$  NMR spectra of Cu-MADMECl ( $\text{CDCl}_3$ )

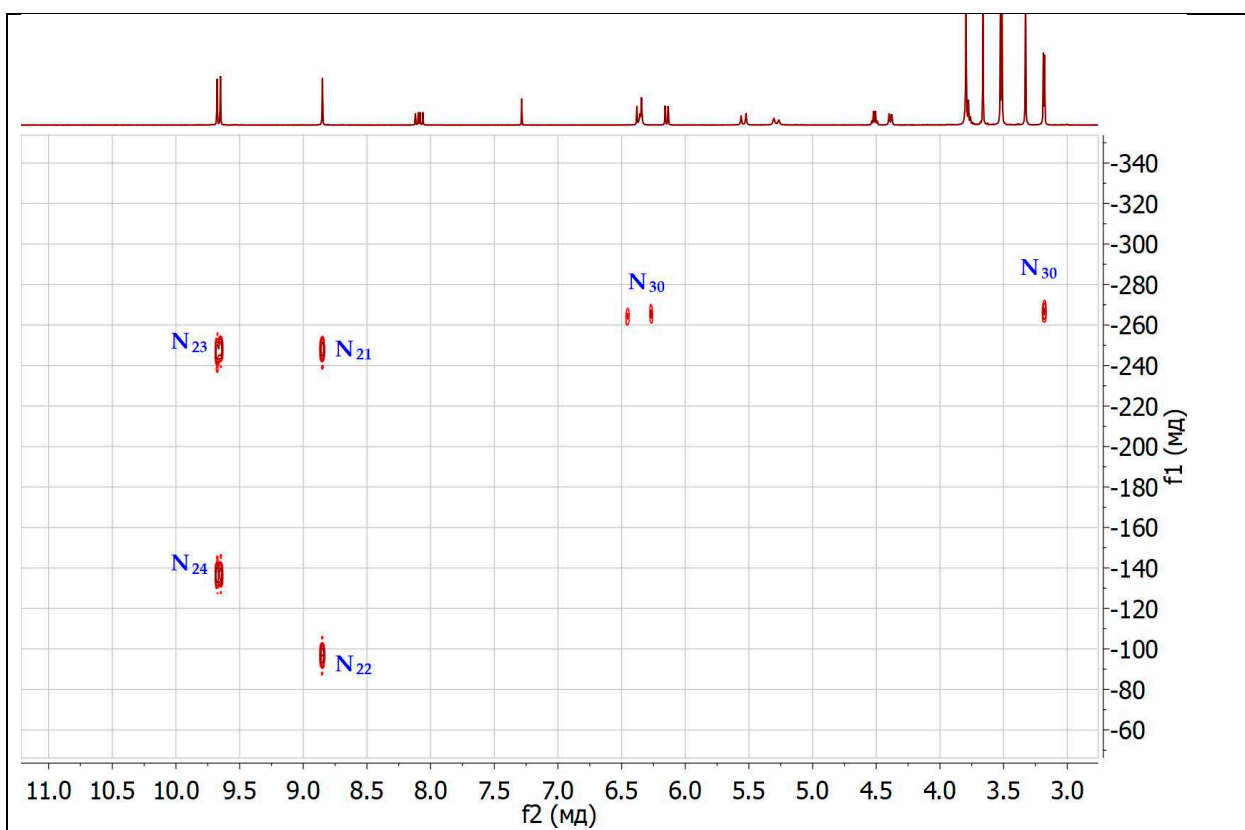

Figure S5. HMBC ( $^{15}\text{N}$ - $^1\text{H}$ ) NMR spectra of MADMECl ( $\text{CDCl}_3$ )

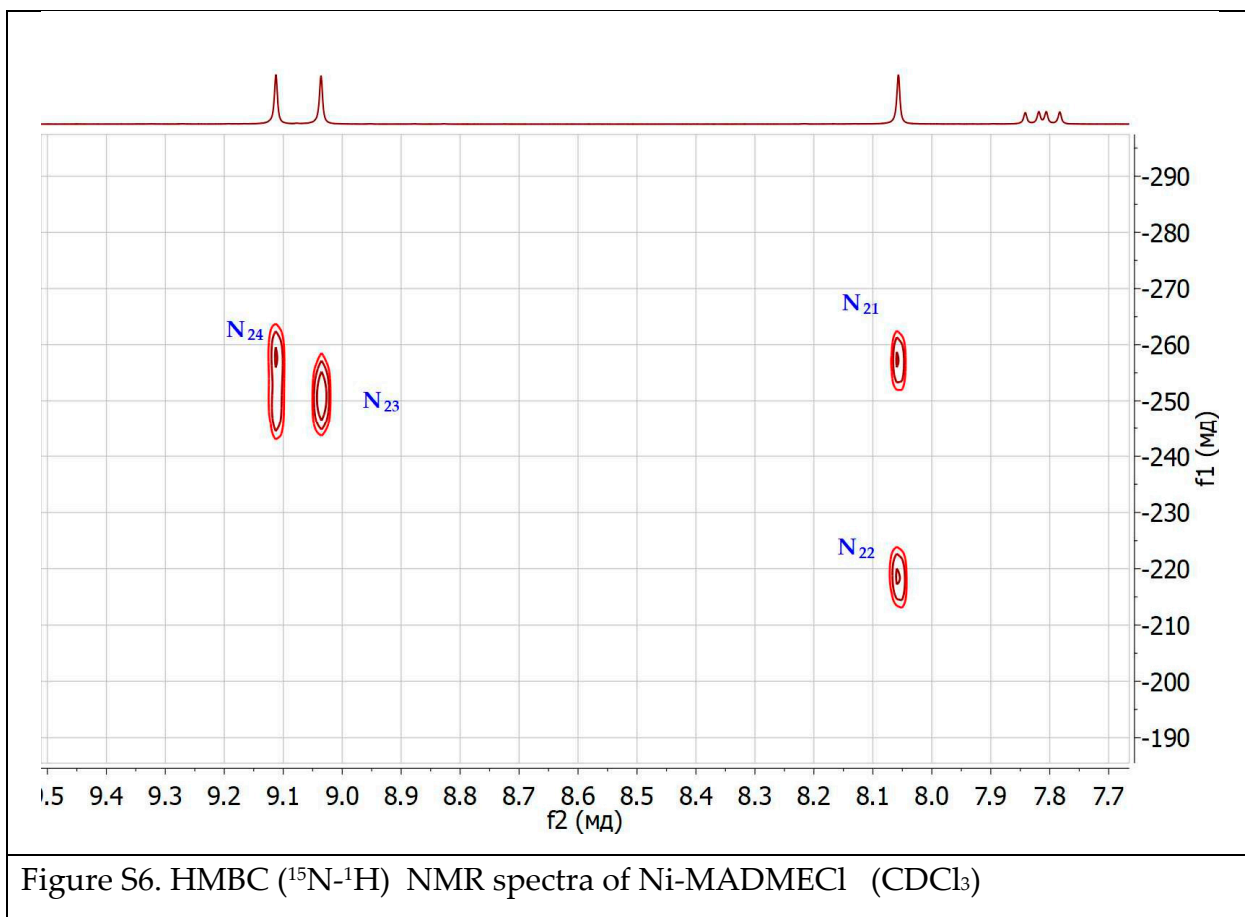

Figure S6. HMBC ( $^{15}\text{N}$ - $^1\text{H}$ ) NMR spectra of Ni-MADMECl ( $\text{CDCl}_3$ )

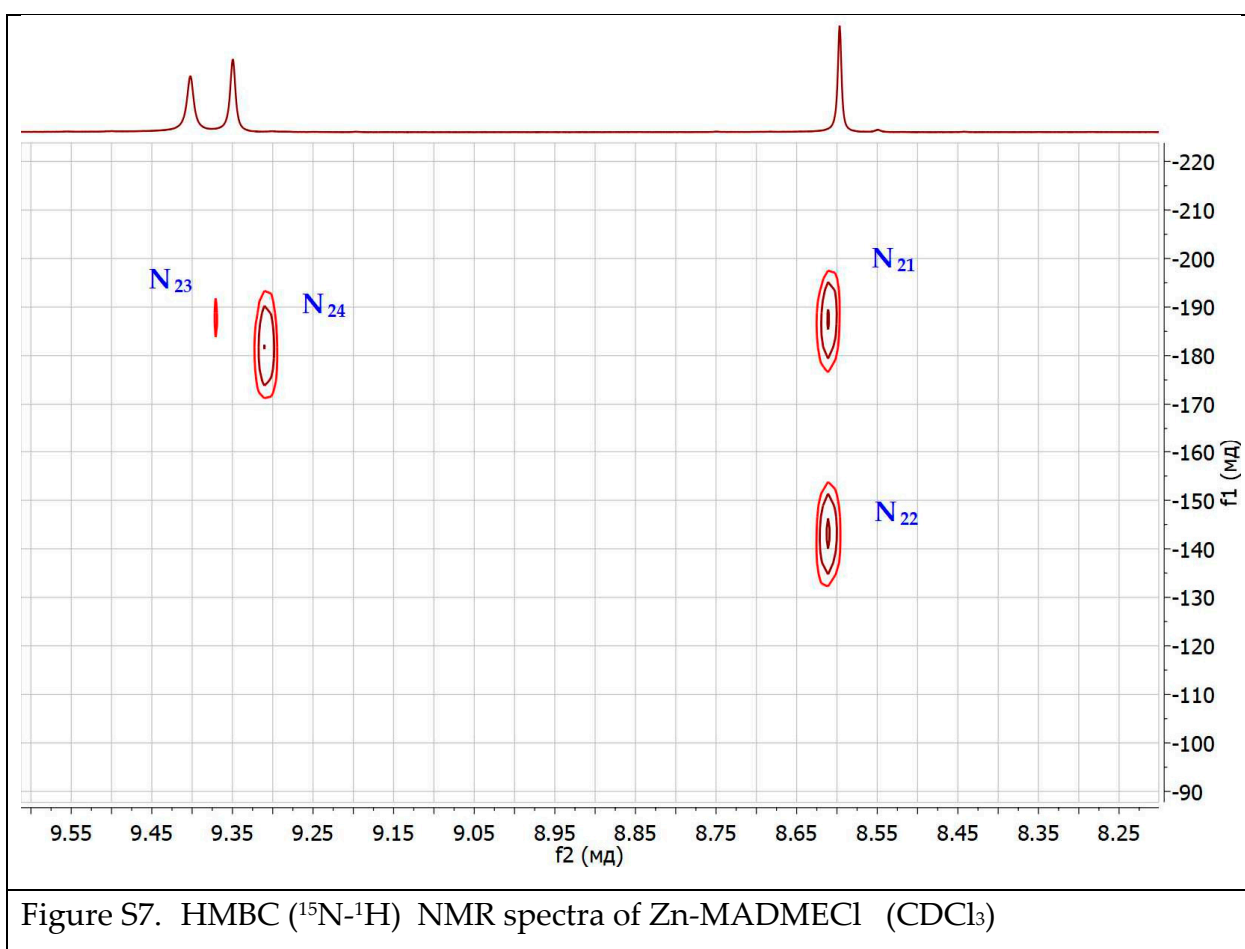

Figure S7. HMBC ( $^{15}\text{N}$ - $^1\text{H}$ ) NMR spectra of Zn-MADMECl ( $\text{CDCl}_3$ )

**Table S1.** Experimental (CDCl<sub>3</sub>) and calculated (DFT GIAO) chemical shifts of <sup>13</sup>C

| M=                 | H <sub>2</sub>    |         | Zn                |         | Ni                |         |
|--------------------|-------------------|---------|-------------------|---------|-------------------|---------|
| No <sup>13</sup> C | CDCl <sub>3</sub> | GIAO    | CDCl <sub>3</sub> | GIAO    | CDCl <sub>3</sub> | GIAO    |
| 10                 | 98.70             | 99.197  | 102.97            | 109.549 | 101.20            | 110.169 |
| 5                  | 101.46            | 107.867 | 100.91            | 102.940 | 103.31            | 101.632 |
| 20                 | 93.67             | 88.983  | 93.48             | 89.507  | 92.48             | 88.153  |
| 36                 | 129.46            | 131.928 | 130.28            | 132.962 | 129.51            | 132.230 |
| 43                 | 121.50            | 124.192 | 119.7             | 121.836 | 120.15            | 122.055 |
| 39                 | 37.73             | 33.950  | 37.7              | 34.169  | 36.48             | 41.974  |
| 18                 | 49.29             | 46.774  | 47.1              | 43.451  | 47.37             | 53.712  |
| 17                 | 53.08             | 49.087  | 52.38             | 55.696  | 51.76             | 56.747  |
| 42                 | 52.07             | 46.525  | 51.54             | 46.435  | 52.03             | 55.435  |
| 37                 | 19.67             | 23.922  | 19.19             | 23.556  | 19.25             | 23.539  |
| 53                 | 51.64             | 54.401  | 51.88             | 54.408  | 51.68             | 54.382  |
| 33                 | 11.89             | 15.362  | 12.29             | 14.935  | 11.98             | 15.093  |
| 35                 | 12.19             | 12.926  | 10.93             | 12.840  | 10.94             | 12.734  |
| 34                 | 11.35             | 12.611  | 11.9              | 12.208  | 11.86             | 12.490  |
| 32                 | 27.16             | 29.014  | 26.88             | 25.216  | 27.09             | 29.882  |
| 50                 | 31.12             | 36.306  | 29.05             | 35.957  | 31.08             | 35.665  |
| 49                 | 29.64             | 31.934  | 30.83             | 30.838  | 26.99             | 28.561  |
| 45                 | 23.04             | 25.439  | 22.89             | 28.256  | 17.35             | 21.716  |
| 38                 | 17.75             | 22.176  | 17.53             | 21.702  | 19.88             | 21.354  |
| 51                 | 174.25            | 177.631 | 174.67            | 177.604 | 173.49            | 177.594 |
| 40                 | 173.54            | 182.356 | 173.43            | 182.718 | 173.33            | 180.399 |
| 19                 | 170.11            | 175.389 | 165.09            | 170.930 | 156.03            | 165.464 |
| 28                 | 168.82            | 170.202 | 171.4             | 170.638 | 170.33            | 170.072 |
| 16                 | 166.67            | 172.195 | 161.56            | 168.510 | 153.12            | 163.875 |
| 6                  | 154.21            | 154.772 | 147.31            | 147.199 | 141.83            | 145.567 |
| 9                  | 149.08            | 146.050 | 141.42            | 141.286 | 138.01            | 138.876 |
| 8                  | 144.75            | 147.617 | 139.81            | 143.380 | 137.79            | 145.464 |
| 14                 | 138.91            | 138.093 | 145.06            | 153.477 | 140.97            | 149.112 |
| 1                  | 136.10            | 143.848 | 152.82            | 158.986 | 145.46            | 155.607 |
| 3                  | 134.96            | 138.211 | 138.28            | 142.171 | 139.29            | 144.039 |
| 4                  | 134.96            | 134.741 | 143.59            | 144.984 | 139.93            | 141.351 |
| 7                  | 134.81            | 135.880 | 131.5             | 133.108 | 134.74            | 134.418 |
| 12                 | 134.53            | 143.481 | 141.42            | 149.158 | 141.27            | 149.991 |
| 11                 | 130.17            | 127.252 | 147.55            | 140.714 | 132.42            | 135.923 |
| 2                  | 129.89            | 132.195 | 133.47            | 133.590 | 133.46            | 136.550 |
| 13                 | 128.08            | 126.198 | 132.78            | 130.440 | 133.84            | 131.744 |
| 15                 | 102.02            | 99.820  | 101.67            | 99.983  | 100.29            | 97.850  |
| MAE                | 1.684             |         | 1.801             |         | 3.61              |         |
| R <sup>2</sup>     | 0.9961            |         | 0.9957            |         | 0.996             |         |

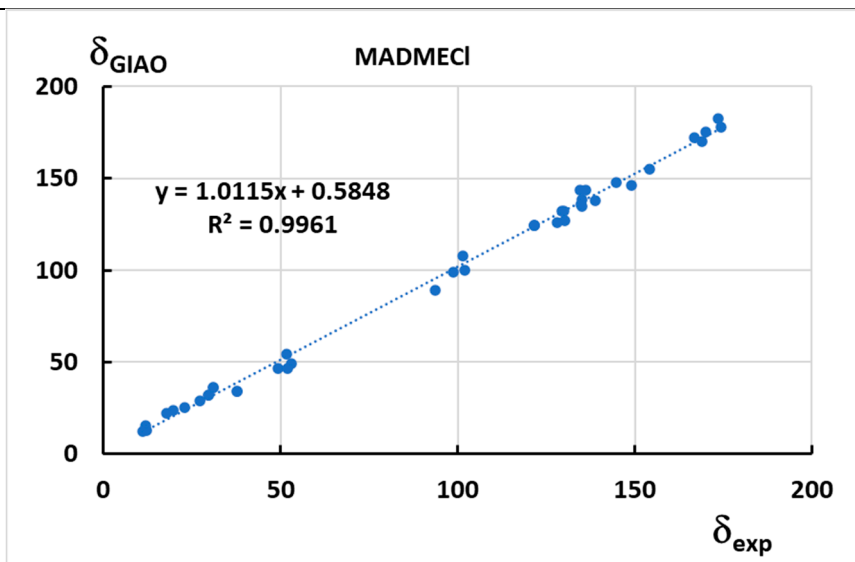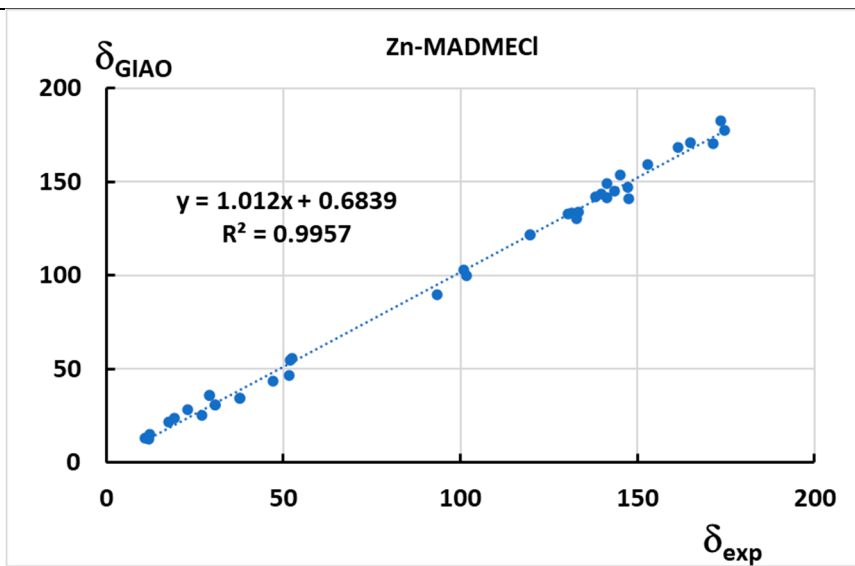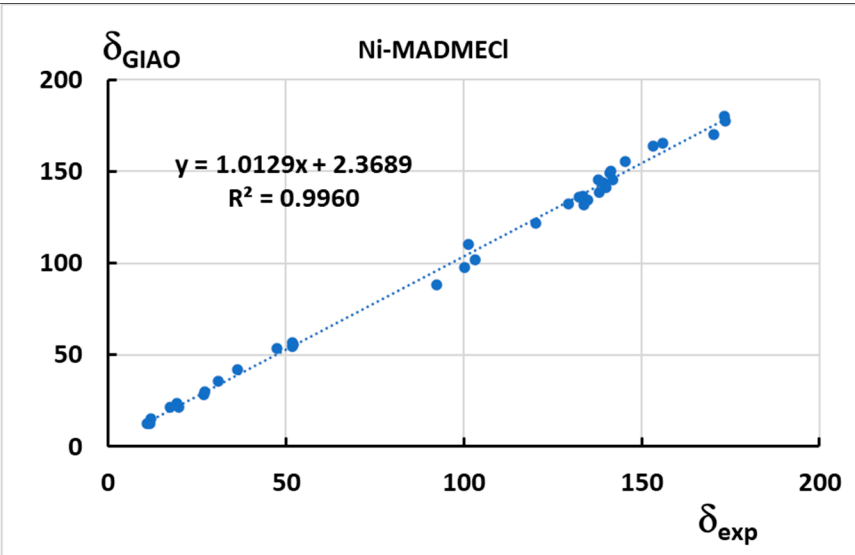

Figure S8. Correlations of calculated and experimental chemical shifts of  $^{13}\text{C}$

**Table S2.** Experimental (CDCl<sub>3</sub>) and calculated (DFT GIAO) chemical shifts of <sup>1</sup>H

| M=                | NH2   |        | Zn    |        | Ni    |        |
|-------------------|-------|--------|-------|--------|-------|--------|
| No <sup>1</sup> H | CDCl3 | GIAO   | CDCl3 | GIAO   | CDCl3 | GIAO   |
| 26                | 9.65  | 10.100 | 9.35  | 10.209 | 9.11  | 9.479  |
| 25                | 9.68  | 10.574 | 9.4   | 9.916  | 9.04  | 9.227  |
| 27                | 8.85  | 9.157  | 8.6   | 8.800  | 8.06  | 8.014  |
| 46                | 8.09  | 8.925  | 7.96  | 8.794  | 7.81  | 8.508  |
| 47                | 6.38  | 6.758  | 6.08  | 6.539  | 6.04  | 6.332  |
| 31                | 6.35  | 7.296  | 6.12  | 6.569  | 6.24  | 5.871  |
| 44                | 6.14  | 6.764  | 5.92  | 6.591  | 5.94  | 6.280  |
| 39'               | 5.54  | 5.229  | 5.17  | 5.022  | 4.93  | 4.642  |
| 39''              | 5.28  | 4.851  | 4.85  | 4.536  | 4.52  | 3.701  |
| 56                | 4.51  | 4.652  | 4.35  | 4.405  | 4.14  | 3.961  |
| 48                | 4.39  | 3.908  | 4.16  | 3.590  | 3.98  | 3.642  |
| 42                | 3.8   | 4.257  | 3.75  | 4.230  | 3.84  | 4.118  |
| 37                | 3.78  | 3.989  | 3.60  | 3.938  | 3.57  | 3.600  |
| 53                | 3.66  | 3.769  | 3.52  | 3.748  | 3.66  | 3.635  |
| 33                | 3.52  | 3.682  | 3.36  | 3.440  | 3.15  | 3.169  |
| 35                | 3.51  | 3.996  | 3.18  | 3.756  | 3.14  | 3.403  |
| 34                | 3.33  | 3.569  | 3.18  | 3.534  | 3.2   | 3.166  |
| 32                | 3.18  | 2.697  | 3.01  | 3.121  | 3.19  | 3.090  |
| 50'               | 2.59  | 3.161  | 2.47  | 3.083  | 2.45  | 2.818  |
| 50''              | 2.24  | 1.866  | 2.16  | 1.739  | 2.35  | 2.308  |
| 49'               | 2.21  | 3.020  | 2.07  | 2.888  | 1.78  | 1.546  |
| 49''              | 1.81  | 1.375  | 1.76  | 1.436  | 1.61  | 0.940  |
| 45                | 1.77  | 1.846  | 1.71  | 1.853  | 1.49  | 1.914  |
| 38                | 1.74  | 1.990  | 1.64  | 1.780  | 1.58  | 1.663  |
| 21                | -1.56 | -2.437 |       |        |       |        |
| 23                | -1.78 | -2.639 |       |        |       |        |
| MAE               |       | 0.152  |       | 0.230  |       | 0.009  |
| R <sup>2</sup>    |       | 0.984  |       | 0.975  |       | 0.9806 |

**Table S3.** Experimental (CDCl<sub>3</sub>) and calculated (DFT GIAO) chemical shifts of <sup>15</sup>N

| M=                 | NH2     |          | Zn      |          | Ni      |         |
|--------------------|---------|----------|---------|----------|---------|---------|
| No <sup>15</sup> N | CDCl3   | GIAO     | CDCl3   | GIAO     | CDCl3   | GIAO    |
| 24                 | -136.52 | -149.195 | -181.8  | -194.282 | -245.9  | -239.09 |
| 21                 | -246.62 | -273.603 | -187.42 | -211.27  | -257.81 | -257.76 |
| 22                 | -96.74  | -127.499 | -143.42 | -175.76  | -218.4  | -222.36 |
| 23                 | -247.74 | -268.111 | -187.77 | -203.35  | -250.32 | -244.74 |
| 30                 | -266.71 | -289.51  |         |          |         |         |

|                           |                           |                           |
|---------------------------|---------------------------|---------------------------|
|                           |                           |                           |
| 0.65% Cu-MADMECl at 72 °C | 1.35% Cu-MADMECl at 71 °C | 1.96% Cu-MADMECl at 70 °C |
|                           |                           |                           |
| 0.65% Cu-MADMECl at 25 °C | 1.35% Cu-MADMECl at 25 °C | 1.96% Cu-MADMECl at 25 °C |
|                           |                           |                           |
| 0,48% Zn-MADMECl at 70 °C | 1,42% Zn-MADMECl at 68 °C | 3,36% Zn-MADMECl at 71 °C |
|                           |                           |                           |
| 0,48% Zn-MADMECl at 25 °C | 1,42% Zn-MADMECl at 25 °C | 3,36% Zn-MADMECl at 25 °C |
|                           |                           |                           |
| 0,32% Ni-MADMECl at 71 °C | 1,04% Ni-MADMECl at 71 °C | 1,54% Ni-MADMECl at 70 °C |
|                           |                           |                           |
| 0,32% Ni-MADMECl at 25 °C | 1,04% Ni-MADMECl at 25 °C | 1,54% Ni-MADMECl at 25 °C |
|                           |                           |                           |
| 0,62% MADMECl at 69 °C    | 0,855% MADMECl at 70 °C   | 2,104% MADMECl at 68 °C   |
|                           |                           |                           |
| 0,62% MADMECl at 25 °C    | 0,855% MADMECl at 25 °C   | 2,104% MADMECl at 25 °C   |

Fig S9 The "fingerprints" textures and the systems of Newton's rings of the mixture CB-2 with M-MADMECl

**Cartesian coordinates of MADMECl optimized CAM-B3LYP/6-31g(d,p) level of theory:**

|   |                 |                 |                 |
|---|-----------------|-----------------|-----------------|
| N | -3.375768000000 | 0.658072000000  | 0.183966000000  |
| N | -2.522590000000 | -1.912597000000 | -0.611031000000 |
| C | 0.892081000000  | 3.474646000000  | 0.101412000000  |
| C | 0.790639000000  | 2.046754000000  | -0.017717000000 |
| C | 1.801365000000  | 1.047991000000  | -0.124321000000 |
| C | 1.547761000000  | -0.296314000000 | -0.339460000000 |
| C | -0.371880000000 | 3.975047000000  | 0.357676000000  |
| C | 2.650545000000  | -1.353812000000 | -0.363011000000 |
| C | 0.513139000000  | -2.129897000000 | -0.960215000000 |
| C | -1.274644000000 | 2.877591000000  | 0.347907000000  |
| C | -2.645070000000 | 2.955081000000  | 0.558474000000  |
| C | -3.862686000000 | -2.192188000000 | -0.506082000000 |
| C | -4.030479000000 | -3.578380000000 | -0.879008000000 |
| C | -2.790689000000 | -4.071803000000 | -1.208991000000 |
| C | -1.833991000000 | -3.005952000000 | -1.021232000000 |
| C | -4.813766000000 | -1.288371000000 | -0.106278000000 |
| C | -4.583718000000 | 0.062352000000  | 0.217509000000  |
| C | -5.638187000000 | 0.992286000000  | 0.594878000000  |
| C | -3.609539000000 | 1.958988000000  | 0.511537000000  |
| C | -5.025288000000 | 2.193733000000  | 0.775944000000  |
| C | -0.459109000000 | -3.094160000000 | -1.200315000000 |
| N | 0.328791000000  | -0.868529000000 | -0.550352000000 |
| N | -0.530480000000 | 1.747740000000  | 0.105350000000  |
| C | 1.979971000000  | -2.453112000000 | -1.193471000000 |
| H | -2.146693000000 | -0.991811000000 | -0.408730000000 |
| H | -0.892497000000 | 0.802241000000  | 0.061846000000  |
| H | -5.834773000000 | -1.646419000000 | -0.042228000000 |
| H | -3.002321000000 | 3.953204000000  | 0.788072000000  |
| H | -0.093023000000 | -4.059172000000 | -1.531680000000 |
| C | 2.988292000000  | -1.824930000000 | 1.063232000000  |
| H | 3.143276000000  | -0.971738000000 | 1.728193000000  |
| H | 2.129824000000  | -2.362794000000 | 1.477650000000  |
| C | 4.226777000000  | -2.711202000000 | 1.105016000000  |
| H | 5.102754000000  | -2.175522000000 | 0.719921000000  |
| H | 4.120417000000  | -3.597111000000 | 0.470098000000  |
| C | 4.556078000000  | -3.181748000000 | 2.499979000000  |
| O | 3.969367000000  | -2.863493000000 | 3.505531000000  |
| C | 2.055842000000  | 4.388903000000  | -0.106946000000 |
| O | 2.353436000000  | 5.266581000000  | 0.696638000000  |
| N | 2.709617000000  | 4.244168000000  | -1.284015000000 |
| H | 2.496370000000  | 3.461577000000  | -1.886809000000 |
| C | 3.855221000000  | 5.068890000000  | -1.600931000000 |
| H | 4.422617000000  | 4.586421000000  | -2.397721000000 |
| C | -2.442030000000 | -5.434170000000 | -1.712314000000 |
| H | -1.637864000000 | -5.388972000000 | -2.450849000000 |
| H | -2.108694000000 | -6.097644000000 | -0.906453000000 |
| H | -3.308150000000 | -5.901346000000 | -2.184987000000 |
| C | -7.085655000000 | 0.645035000000  | 0.737603000000  |
| H | -7.489894000000 | 0.208744000000  | -0.181934000000 |

|   |                 |                 |                 |
|---|-----------------|-----------------|-----------------|
| H | -7.249814000000 | -0.082494000000 | 1.539803000000  |
| H | -7.684549000000 | 1.527426000000  | 0.971588000000  |
| C | 2.334542000000  | -2.373706000000 | -2.681797000000 |
| H | 1.742910000000  | -3.081440000000 | -3.268015000000 |
| H | 2.141598000000  | -1.369183000000 | -3.069571000000 |
| H | 3.392946000000  | -2.601347000000 | -2.839923000000 |
| C | -0.759187000000 | 5.405821000000  | 0.554411000000  |
| H | 0.128795000000  | 6.024121000000  | 0.675140000000  |
| H | -1.342000000000 | 5.780880000000  | -0.293166000000 |
| H | -1.374055000000 | 5.523412000000  | 1.451357000000  |
| C | -5.328882000000 | -4.247234000000 | -0.911151000000 |
| C | -5.633462000000 | 3.495516000000  | 1.202930000000  |
| H | -5.193535000000 | 4.318453000000  | 0.628347000000  |
| H | -6.698699000000 | 3.497499000000  | 0.951661000000  |
| C | -5.468771000000 | 3.777288000000  | 2.701286000000  |
| H | -4.412760000000 | 3.804478000000  | 2.982793000000  |
| H | -5.918877000000 | 4.736191000000  | 2.973497000000  |
| H | -5.946222000000 | 2.994951000000  | 3.297113000000  |
| O | 5.611846000000  | -4.014602000000 | 2.494234000000  |
| C | 6.006207000000  | -4.502892000000 | 3.777902000000  |
| H | 6.280722000000  | -3.676563000000 | 4.436363000000  |
| H | 5.192947000000  | -5.063533000000 | 4.242721000000  |
| H | 6.863251000000  | -5.150361000000 | 3.600134000000  |
| C | 3.253903000000  | 1.442942000000  | 0.055229000000  |
| H | 3.346116000000  | 2.447987000000  | 0.469543000000  |
| H | 3.751574000000  | 0.792100000000  | 0.774903000000  |
| C | 4.063174000000  | 1.415983000000  | -1.224019000000 |
| O | 3.667678000000  | 1.730383000000  | -2.325195000000 |
| O | 5.320092000000  | 1.003019000000  | -1.000083000000 |
| C | 6.179504000000  | 1.000527000000  | -2.143667000000 |
| H | 7.141398000000  | 0.632935000000  | -1.791059000000 |
| H | 5.778820000000  | 0.348800000000  | -2.921919000000 |
| H | 6.281136000000  | 2.009252000000  | -2.548185000000 |
| H | 4.488213000000  | 5.191922000000  | -0.718874000000 |
| C | -5.553959000000 | -5.538007000000 | -0.665854000000 |
| H | -6.555772000000 | -5.948972000000 | -0.723828000000 |
| H | 2.217236000000  | -3.454091000000 | -0.819243000000 |
| H | 3.564104000000  | -0.999142000000 | -0.847234000000 |
| H | 3.553852000000  | 6.067233000000  | -1.933269000000 |
| H | -6.179427000000 | -3.612814000000 | -1.151353000000 |
| H | -4.761895000000 | -6.219411000000 | -0.377016000000 |

**Cartesian coordinates of Zn-MADMECl optimized CAM-B3LYP/6-31g(d,p) level of theory:**

|   |                 |                 |                 |
|---|-----------------|-----------------|-----------------|
| N | -3.212820000000 | 0.714333000000  | 0.251834000000  |
| N | -2.281869000000 | -1.841051000000 | -0.645972000000 |
| C | 0.989928000000  | 3.471497000000  | 0.078617000000  |
| C | 0.829619000000  | 2.031362000000  | -0.023000000000 |
| C | 1.868241000000  | 1.052598000000  | -0.099379000000 |
| C | 1.648032000000  | -0.287537000000 | -0.319130000000 |
| C | -0.244579000000 | 3.996251000000  | 0.354202000000  |

|   |                 |                 |                 |
|---|-----------------|-----------------|-----------------|
| C | 2.756482000000  | -1.333950000000 | -0.334515000000 |
| C | 0.660452000000  | -2.151464000000 | -1.019125000000 |
| C | -1.159321000000 | 2.892138000000  | 0.357938000000  |
| C | -2.507721000000 | 3.012822000000  | 0.619626000000  |
| C | -3.626101000000 | -2.138994000000 | -0.539068000000 |
| C | -3.857323000000 | -3.513181000000 | -0.952107000000 |
| C | -2.640663000000 | -4.021870000000 | -1.313217000000 |
| C | -1.676907000000 | -2.961689000000 | -1.095487000000 |
| C | -4.590652000000 | -1.274479000000 | -0.089971000000 |
| C | -4.408308000000 | 0.066422000000  | 0.280817000000  |
| C | -5.458364000000 | 0.958113000000  | 0.684869000000  |
| C | -3.473841000000 | 2.009573000000  | 0.600084000000  |
| C | -4.872058000000 | 2.184152000000  | 0.880792000000  |
| C | -0.295315000000 | -3.096759000000 | -1.290846000000 |
| N | 0.444946000000  | -0.892002000000 | -0.563264000000 |
| N | -0.482054000000 | 1.714138000000  | 0.099195000000  |
| C | 2.137253000000  | -2.408997000000 | -1.235366000000 |
| H | -5.602967000000 | -1.656927000000 | -0.025887000000 |
| H | -2.854230000000 | 4.011464000000  | 0.862788000000  |
| H | 0.059518000000  | -4.054374000000 | -1.653750000000 |
| C | 3.036938000000  | -1.847744000000 | 1.089119000000  |
| H | 3.167664000000  | -1.012045000000 | 1.781205000000  |
| H | 2.162871000000  | -2.395626000000 | 1.455313000000  |
| C | 4.271347000000  | -2.738176000000 | 1.155624000000  |
| H | 5.164201000000  | -2.194933000000 | 0.823806000000  |
| H | 4.190137000000  | -3.605227000000 | 0.491722000000  |
| C | 4.539982000000  | -3.250464000000 | 2.549080000000  |
| O | 3.906063000000  | -2.965974000000 | 3.535907000000  |
| C | 2.166458000000  | 4.351542000000  | -0.185818000000 |
| O | 2.516870000000  | 5.237792000000  | 0.586944000000  |
| N | 2.773082000000  | 4.162650000000  | -1.383931000000 |
| H | 2.508602000000  | 3.375474000000  | -1.958115000000 |
| C | 3.921889000000  | 4.949055000000  | -1.775830000000 |
| H | 4.523757000000  | 4.370218000000  | -2.478283000000 |
| C | -2.317849000000 | -5.371481000000 | -1.865855000000 |
| H | -1.545183000000 | -5.310391000000 | -2.636887000000 |
| H | -1.951420000000 | -6.056267000000 | -1.092483000000 |
| H | -3.204402000000 | -5.826390000000 | -2.312265000000 |
| C | -6.897814000000 | 0.581598000000  | 0.842031000000  |
| H | -7.300166000000 | 0.129488000000  | -0.070204000000 |
| H | -7.041281000000 | -0.141003000000 | 1.652308000000  |
| H | -7.512067000000 | 1.454193000000  | 1.072331000000  |
| C | 2.523500000000  | -2.234511000000 | -2.707995000000 |
| H | 1.962333000000  | -2.920702000000 | -3.346899000000 |
| H | 2.320535000000  | -1.212877000000 | -3.042049000000 |
| H | 3.590572000000  | -2.429141000000 | -2.850877000000 |
| C | -0.609510000000 | 5.430882000000  | 0.559393000000  |
| H | 0.286860000000  | 6.047393000000  | 0.607985000000  |
| H | -1.253536000000 | 5.798025000000  | -0.246322000000 |
| H | -1.156155000000 | 5.562110000000  | 1.498202000000  |
| C | -5.171716000000 | -4.149929000000 | -0.987049000000 |
| C | -5.517985000000 | 3.458152000000  | 1.336027000000  |

|    |                 |                 |                 |
|----|-----------------|-----------------|-----------------|
| H  | -5.078547000000 | 4.308385000000  | 0.803039000000  |
| H  | -6.576119000000 | 3.449389000000  | 1.056481000000  |
| C  | -5.395835000000 | 3.688294000000  | 2.846948000000  |
| H  | -4.347055000000 | 3.727428000000  | 3.153031000000  |
| H  | -5.872775000000 | 4.627099000000  | 3.142348000000  |
| H  | -5.869892000000 | 2.875335000000  | 3.403301000000  |
| O  | 5.599037000000  | -4.078394000000 | 2.565134000000  |
| C  | 5.937612000000  | -4.605927000000 | 3.849388000000  |
| H  | 6.180202000000  | -3.799978000000 | 4.544600000000  |
| H  | 5.106224000000  | -5.182164000000 | 4.259785000000  |
| H  | 6.803705000000  | -5.245962000000 | 3.689660000000  |
| C  | 3.308267000000  | 1.461905000000  | 0.137043000000  |
| H  | 3.380109000000  | 2.467099000000  | 0.555011000000  |
| H  | 3.780064000000  | 0.820056000000  | 0.883313000000  |
| C  | 4.179323000000  | 1.427783000000  | -1.100579000000 |
| O  | 3.810673000000  | 1.589720000000  | -2.242839000000 |
| O  | 5.461818000000  | 1.194568000000  | -0.780729000000 |
| C  | 6.381585000000  | 1.201660000000  | -1.875392000000 |
| H  | 7.352920000000  | 0.958344000000  | -1.448610000000 |
| H  | 6.092632000000  | 0.462556000000  | -2.624496000000 |
| H  | 6.409546000000  | 2.186291000000  | -2.346249000000 |
| H  | 4.514454000000  | 5.195831000000  | -0.892822000000 |
| C  | -5.424349000000 | -5.438484000000 | -0.755912000000 |
| H  | -6.434266000000 | -5.828883000000 | -0.817721000000 |
| H  | 2.398957000000  | -3.420344000000 | -0.909915000000 |
| H  | 3.684797000000  | -0.953754000000 | -0.767358000000 |
| H  | 3.627902000000  | 5.889331000000  | -2.254012000000 |
| H  | -6.010199000000 | -3.497024000000 | -1.221047000000 |
| H  | -4.645278000000 | -6.138581000000 | -0.475834000000 |
| Zn | -1.404063000000 | -0.068736000000 | -0.194010000000 |

**Cartesian coordinates of Cu-MADMECl optimized CAM-B3LYP/6-31g(d,p) level of theory:**

|   |                 |                 |                 |
|---|-----------------|-----------------|-----------------|
| N | -3.122408000000 | 0.824826000000  | 0.254650000000  |
| N | -2.320643000000 | -1.682388000000 | -0.715125000000 |
| C | 1.123823000000  | 3.411446000000  | 0.035018000000  |
| C | 0.895462000000  | 1.984141000000  | -0.022475000000 |
| C | 1.896111000000  | 0.968897000000  | -0.023520000000 |
| C | 1.608190000000  | -0.340358000000 | -0.293506000000 |
| C | -0.092935000000 | 4.006843000000  | 0.230577000000  |
| C | 2.650910000000  | -1.445194000000 | -0.329787000000 |
| C | 0.559042000000  | -2.073758000000 | -1.181886000000 |
| C | -1.053929000000 | 2.947153000000  | 0.243130000000  |
| C | -2.388276000000 | 3.127976000000  | 0.518023000000  |
| C | -3.658454000000 | -1.975299000000 | -0.527398000000 |
| C | -3.949729000000 | -3.314671000000 | -1.007205000000 |
| C | -2.778740000000 | -3.810798000000 | -1.501887000000 |
| C | -1.780341000000 | -2.785227000000 | -1.279988000000 |
| C | -4.573567000000 | -1.125446000000 | 0.022998000000  |
| C | -4.326619000000 | 0.203783000000  | 0.382487000000  |
| C | -5.336866000000 | 1.117137000000  | 0.830222000000  |
| C | -3.355431000000 | 2.136216000000  | 0.575264000000  |

|   |                 |                 |                 |
|---|-----------------|-----------------|-----------------|
| C | -4.728053000000 | 2.340437000000  | 0.939213000000  |
| C | -0.420430000000 | -2.957903000000 | -1.541849000000 |
| N | 0.375954000000  | -0.850346000000 | -0.625609000000 |
| N | -0.432424000000 | 1.725298000000  | 0.048553000000  |
| C | 2.026914000000  | -2.385297000000 | -1.367031000000 |
| H | -5.585008000000 | -1.490169000000 | 0.155939000000  |
| H | -2.707584000000 | 4.142416000000  | 0.728674000000  |
| H | -0.105920000000 | -3.894936000000 | -1.984770000000 |
| C | 2.808025000000  | -2.097148000000 | 1.054360000000  |
| H | 2.976541000000  | -1.333001000000 | 1.818170000000  |
| H | 1.870979000000  | -2.588634000000 | 1.335189000000  |
| C | 3.952363000000  | -3.101804000000 | 1.106021000000  |
| H | 4.904706000000  | -2.627691000000 | 0.839522000000  |
| H | 3.819658000000  | -3.916904000000 | 0.387505000000  |
| C | 4.119482000000  | -3.716564000000 | 2.473854000000  |
| O | 3.498396000000  | -3.409783000000 | 3.462145000000  |
| C | 2.366839000000  | 4.198848000000  | -0.198491000000 |
| O | 2.749205000000  | 5.087135000000  | 0.555115000000  |
| N | 3.021933000000  | 3.923367000000  | -1.355485000000 |
| H | 2.697331000000  | 3.176567000000  | -1.950020000000 |
| C | 4.230287000000  | 4.639275000000  | -1.703088000000 |
| H | 4.586871000000  | 4.275690000000  | -2.667171000000 |
| C | -2.521970000000 | -5.119641000000 | -2.173751000000 |
| H | -1.816818000000 | -5.008802000000 | -3.001834000000 |
| H | -2.100616000000 | -5.860581000000 | -1.484722000000 |
| H | -3.449599000000 | -5.534299000000 | -2.573296000000 |
| C | -6.765763000000 | 0.760955000000  | 1.094266000000  |
| H | -7.248808000000 | 0.335066000000  | 0.208700000000  |
| H | -6.857221000000 | 0.024627000000  | 1.899405000000  |
| H | -7.342663000000 | 1.639285000000  | 1.389805000000  |
| C | 2.493149000000  | -2.076926000000 | -2.793850000000 |
| H | 1.918648000000  | -2.648694000000 | -3.526877000000 |
| H | 2.380041000000  | -1.012556000000 | -3.015684000000 |
| H | 3.550572000000  | -2.329420000000 | -2.913544000000 |
| C | -0.392374000000 | 5.464500000000  | 0.365687000000  |
| H | 0.532567000000  | 6.035983000000  | 0.432719000000  |
| H | -0.979417000000 | 5.832862000000  | -0.481822000000 |
| H | -0.971497000000 | 5.661609000000  | 1.272929000000  |
| C | -5.275187000000 | -3.928401000000 | -0.976769000000 |
| C | -5.327071000000 | 3.639323000000  | 1.388045000000  |
| H | -4.917498000000 | 4.463064000000  | 0.793289000000  |
| H | -6.401786000000 | 3.632722000000  | 1.181350000000  |
| C | -5.099899000000 | 3.925771000000  | 2.877024000000  |
| H | -4.032446000000 | 3.964913000000  | 3.109749000000  |
| H | -5.547764000000 | 4.880400000000  | 3.167173000000  |
| H | -5.541777000000 | 3.140033000000  | 3.495463000000  |
| O | 5.071819000000  | -4.665555000000 | 2.465804000000  |
| C | 5.311818000000  | -5.294819000000 | 3.726209000000  |
| H | 5.627574000000  | -4.559976000000 | 4.469193000000  |
| H | 4.408051000000  | -5.789384000000 | 4.087150000000  |
| H | 6.101379000000  | -6.023375000000 | 3.549941000000  |
| C | 3.320719000000  | 1.319994000000  | 0.344510000000  |

|    |                 |                 |                 |
|----|-----------------|-----------------|-----------------|
| H  | 3.383656000000  | 2.276085000000  | 0.866529000000  |
| H  | 3.717824000000  | 0.596560000000  | 1.063065000000  |
| C  | 4.305436000000  | 1.356310000000  | -0.805736000000 |
| O  | 4.064564000000  | 1.137715000000  | -1.971733000000 |
| O  | 5.538117000000  | 1.641950000000  | -0.358657000000 |
| C  | 6.568399000000  | 1.654789000000  | -1.349189000000 |
| H  | 7.494602000000  | 1.847859000000  | -0.810832000000 |
| H  | 6.616515000000  | 0.694408000000  | -1.865609000000 |
| H  | 6.385909000000  | 2.440142000000  | -2.084550000000 |
| H  | 5.007732000000  | 4.487225000000  | -0.947908000000 |
| C  | -5.530432000000 | -5.226600000000 | -0.812779000000 |
| H  | -6.548467000000 | -5.600363000000 | -0.817817000000 |
| H  | 2.218056000000  | -3.438706000000 | -1.142004000000 |
| H  | 3.617935000000  | -1.078106000000 | -0.677224000000 |
| H  | 4.039274000000  | 5.713116000000  | -1.770753000000 |
| H  | -6.117708000000 | -3.250691000000 | -1.097489000000 |
| H  | -4.742833000000 | -5.952858000000 | -0.645812000000 |
| Cu | -1.384831000000 | 0.006686000000  | -0.246977000000 |

**Cartesian coordinates of Ni-MADMECl optimized CAM-B3LYP/6-31g(d,p) level of theory:**

|   |                 |                 |                 |
|---|-----------------|-----------------|-----------------|
| N | 3.032311000000  | -0.810666000000 | 0.208845000000  |
| N | 2.218804000000  | 1.585854000000  | -0.739417000000 |
| C | -1.071912000000 | -3.450477000000 | 0.006398000000  |
| C | -0.850235000000 | -2.024917000000 | 0.007854000000  |
| C | -1.842792000000 | -1.011625000000 | 0.112183000000  |
| C | -1.555740000000 | 0.263063000000  | -0.270906000000 |
| C | 0.158657000000  | -4.048992000000 | -0.023801000000 |
| C | -2.575777000000 | 1.378756000000  | -0.372026000000 |
| C | -0.558823000000 | 1.835496000000  | -1.455113000000 |
| C | 1.111783000000  | -2.986794000000 | -0.046872000000 |
| C | 2.456006000000  | -3.166712000000 | 0.155495000000  |
| C | 3.477040000000  | 2.003320000000  | -0.343062000000 |
| C | 3.755646000000  | 3.330822000000  | -0.855891000000 |
| C | 2.675874000000  | 3.684545000000  | -1.610262000000 |
| C | 1.722670000000  | 2.605254000000  | -1.479861000000 |
| C | 4.360650000000  | 1.227068000000  | 0.342458000000  |
| C | 4.163557000000  | -0.136372000000 | 0.560717000000  |
| C | 5.196484000000  | -1.031166000000 | 0.989725000000  |
| C | 3.352270000000  | -2.136412000000 | 0.363782000000  |
| C | 4.695962000000  | -2.295808000000 | 0.834865000000  |
| C | 0.401647000000  | 2.691172000000  | -1.910675000000 |
| N | -0.335290000000 | 0.702495000000  | -0.741508000000 |
| N | 0.476221000000  | -1.754782000000 | -0.066641000000 |
| C | -2.034522000000 | 2.113302000000  | -1.607327000000 |
| H | 5.309246000000  | 1.655337000000  | 0.640590000000  |
| H | 2.819206000000  | -4.184084000000 | 0.239687000000  |
| H | 0.092428000000  | 3.559970000000  | -2.477502000000 |
| C | -2.585126000000 | 2.240693000000  | 0.900144000000  |
| H | -2.728835000000 | 1.607686000000  | 1.780207000000  |
| H | -1.605715000000 | 2.711827000000  | 1.033004000000  |

|   |                 |                 |                 |
|---|-----------------|-----------------|-----------------|
| C | -3.674044000000 | 3.306995000000  | 0.886621000000  |
| H | -4.659857000000 | 2.854998000000  | 0.719510000000  |
| H | -3.540727000000 | 4.030778000000  | 0.077182000000  |
| C | -3.748836000000 | 4.070332000000  | 2.186319000000  |
| O | -3.182318000000 | 3.772225000000  | 3.209481000000  |
| C | -2.336654000000 | -4.234859000000 | -0.072533000000 |
| O | -2.591269000000 | -5.164481000000 | 0.685054000000  |
| N | -3.165933000000 | -3.910986000000 | -1.096533000000 |
| H | -2.937860000000 | -3.139553000000 | -1.704209000000 |
| C | -4.403096000000 | -4.633436000000 | -1.297605000000 |
| H | -4.929292000000 | -4.193616000000 | -2.145174000000 |
| C | 2.460619000000  | 4.912675000000  | -2.432023000000 |
| H | 1.920051000000  | 4.682611000000  | -3.353993000000 |
| H | 1.880589000000  | 5.671943000000  | -1.894851000000 |
| H | 3.416927000000  | 5.363826000000  | -2.704279000000 |
| C | 6.553089000000  | -0.616635000000 | 1.464899000000  |
| H | 7.095412000000  | -0.047661000000 | 0.702365000000  |
| H | 6.494140000000  | 0.012564000000  | 2.358871000000  |
| H | 7.162811000000  | -1.486012000000 | 1.717918000000  |
| C | -2.595684000000 | 1.555098000000  | -2.918953000000 |
| H | -2.079904000000 | 1.988615000000  | -3.779490000000 |
| H | -2.487542000000 | 0.468651000000  | -2.957164000000 |
| H | -3.661667000000 | 1.782489000000  | -3.005816000000 |
| C | 0.474104000000  | -5.509303000000 | -0.038321000000 |
| H | -0.436463000000 | -6.094981000000 | 0.081422000000  |
| H | 0.969610000000  | -5.802488000000 | -0.969368000000 |
| H | 1.145136000000  | -5.772848000000 | 0.784930000000  |
| C | 5.000072000000  | 4.058503000000  | -0.621177000000 |
| C | 5.359336000000  | -3.603482000000 | 1.147007000000  |
| H | 5.052905000000  | -4.359198000000 | 0.415737000000  |
| H | 6.441804000000  | -3.496960000000 | 1.024428000000  |
| C | 5.057941000000  | -4.111503000000 | 2.561851000000  |
| H | 3.983495000000  | -4.251556000000 | 2.706967000000  |
| H | 5.555527000000  | -5.066748000000 | 2.751837000000  |
| H | 5.399220000000  | -3.394308000000 | 3.313048000000  |
| O | -4.554713000000 | 5.140741000000  | 2.074676000000  |
| C | -4.711051000000 | 5.909454000000  | 3.269181000000  |
| H | -5.138980000000 | 5.298920000000  | 4.066644000000  |
| H | -3.747531000000 | 6.296828000000  | 3.605503000000  |
| H | -5.382705000000 | 6.726711000000  | 3.011783000000  |
| C | -3.207768000000 | -1.326617000000 | 0.678929000000  |
| H | -3.203897000000 | -2.269717000000 | 1.229163000000  |
| H | -3.484376000000 | -0.576253000000 | 1.427178000000  |
| C | -4.356803000000 | -1.379177000000 | -0.306713000000 |
| O | -4.299956000000 | -1.187877000000 | -1.501290000000 |
| O | -5.505159000000 | -1.643570000000 | 0.332802000000  |
| C | -6.678922000000 | -1.670895000000 | -0.482592000000 |
| H | -7.510482000000 | -1.831807000000 | 0.201100000000  |
| H | -6.796972000000 | -0.726693000000 | -1.017093000000 |
| H | -6.623197000000 | -2.482583000000 | -1.209725000000 |
| H | -5.036468000000 | -4.577667000000 | -0.407173000000 |
| C | 5.124486000000  | 5.383346000000  | -0.538793000000 |

|    |                 |                 |                 |
|----|-----------------|-----------------|-----------------|
| H  | 6.092605000000  | 5.843689000000  | -0.374926000000 |
| H  | -2.217854000000 | 3.190631000000  | -1.563269000000 |
| H  | -3.577609000000 | 0.993234000000  | -0.563484000000 |
| H  | -4.211656000000 | -5.690364000000 | -1.501352000000 |
| H  | 5.894298000000  | 3.450977000000  | -0.500625000000 |
| H  | 4.271282000000  | 6.048827000000  | -0.607276000000 |
| Ni | 1.352385000000  | -0.070857000000 | -0.329102000000 |
